# Supplementary material for: GCC2 as a New Early Diagnostic Biomarker for Non-Small Cell Lung Cancer
Source: MDPI journal article supplement (doi:10.3390/cancers13215482), 2021-10-31
Supplement: s1 [file s1]

## CD63

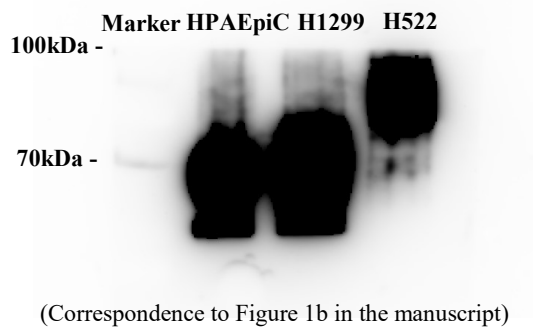

## CD9

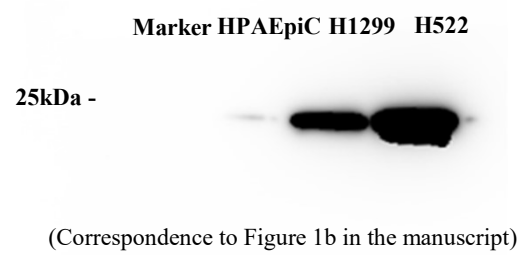

## CD81

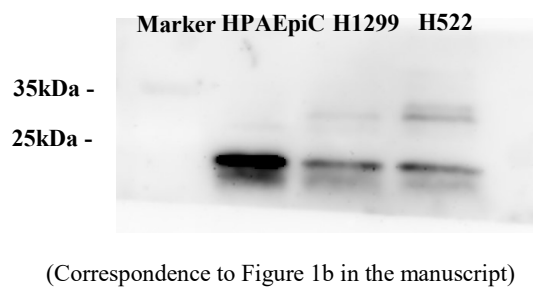

## CD9

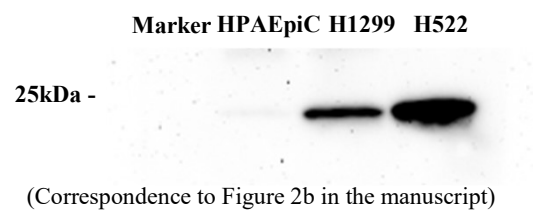

## GCC2

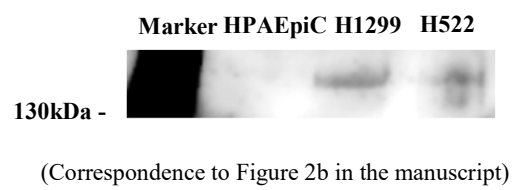

## GCC2

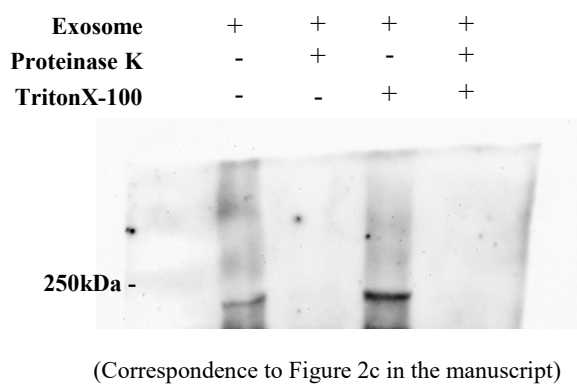

## CD31

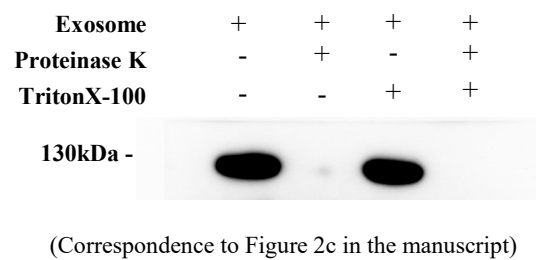

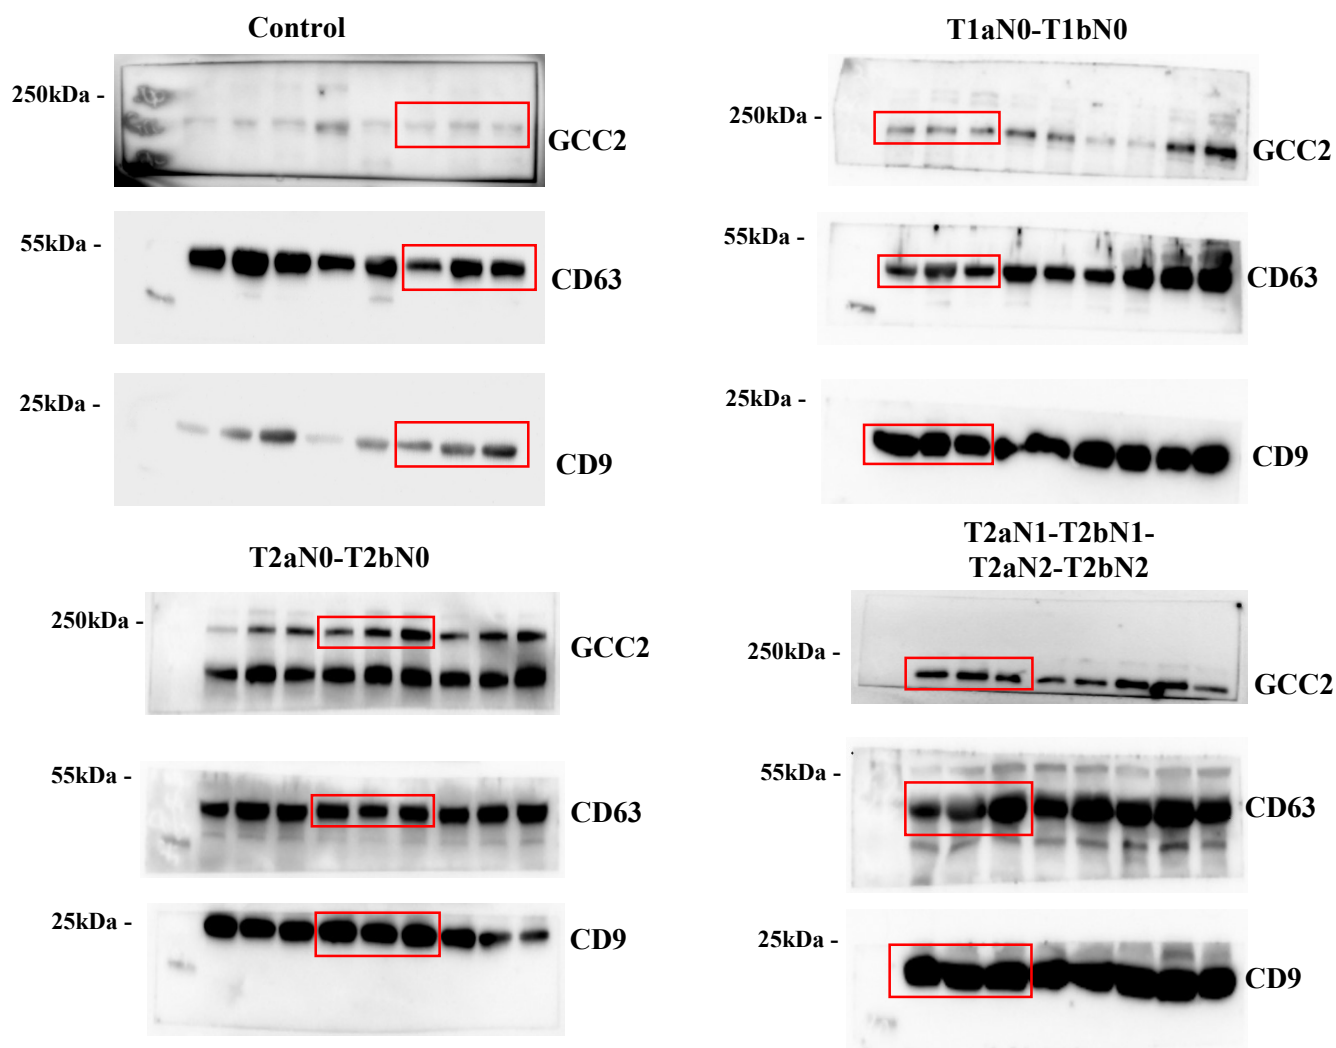

(Correspondence to Figure 3a in the manuscript)

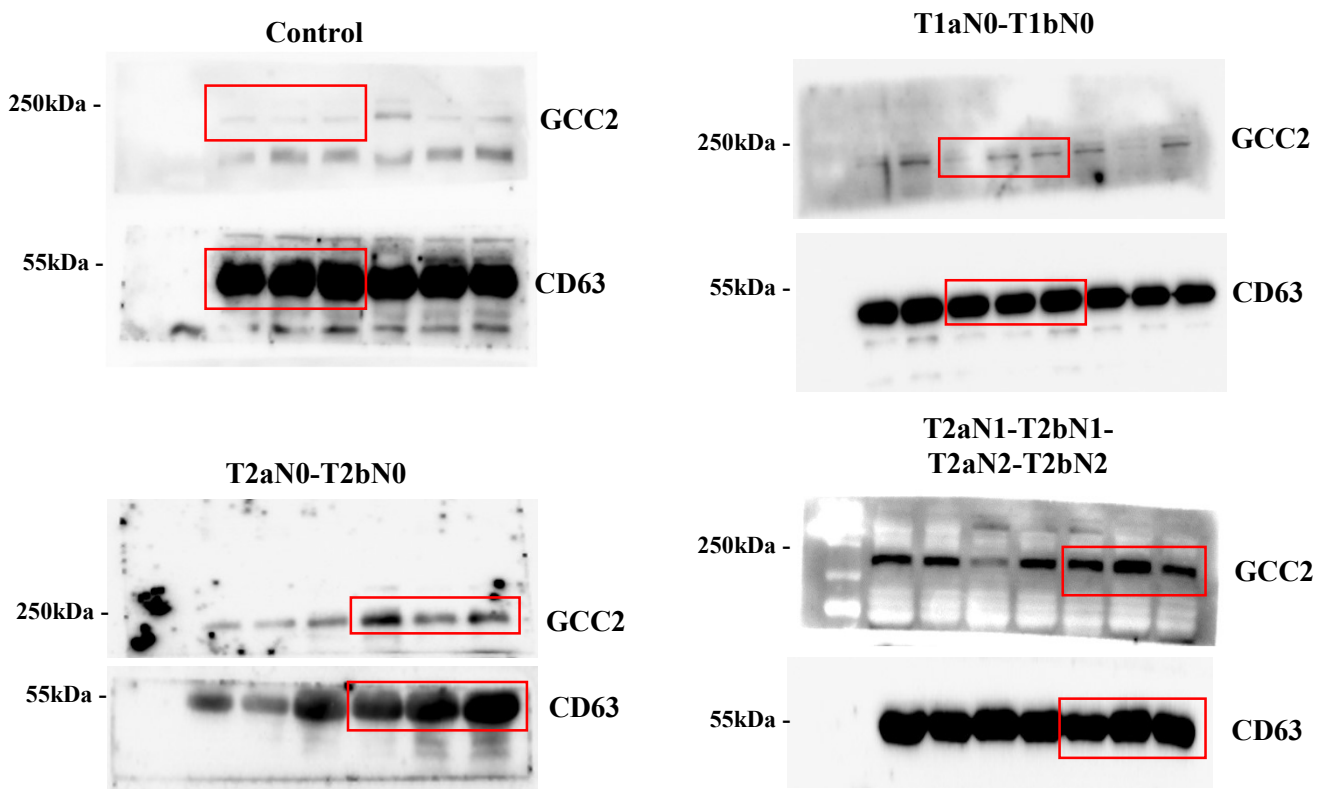

(Correspondence to Figure 3c in the manuscript)

**Supplementary Figure S4.** Original images of western blot.
